# Comparative Genomics of *Helicobacter pylori* Strains of China Associated with Different Clinical Outcome

Yuanhai You, Lihua He, Maojun Zhang, Jianying Fu, Yixin Gu, Binghua Zhang, Xiaoxia Tao, Jianzhong Zhang\*

State Key Laboratory for Infectious Disease Prevention and Control, National Institute for Communicable Disease Control and Prevention, Chinese Center for Disease Control and Prevention, Beijing, China

## Abstract

In this study, a whole-genome CombiMatrix Custom oligonucleotide tiling microarray with 90000 probes covering six sequenced *Helicobacter pylori* (*H. pylori*) genomes was designed. This microarray was used to compare the genomic profiles of eight unsequenced strains isolated from patients with different gastroduodenal diseases in Heilongjiang province of China. Since significant genomic variation was found among these strains, an additional 76 *H. pylori* strains associated with different clinical outcomes were isolated from various provinces of China. These strains were tested by polymerase chain reaction to demonstrate this distinction. We identified several highly variable regions in strains associated with gastritis, gastric ulceration, and gastric cancer. These regions are associated with genes involved in the bacterial type I, type II, and type III R-M systems. They were also associated with the *virB* gene, which lies on the well-studied *cag* pathogenic island. While previous studies have reported on the diverse genetic characterization of this pathogenic island, in this study, we find that it is conserved in all strains tested by microarray. Moreover, a number of genes involved in the type IV secretion system, which is related to horizontal DNA transfer between *H. pylori* strains, were identified in the comparative analysis of the strain-specific genes. These findings may provide insight into new biomarkers for the prediction of gastric diseases.

**Citation:** You Y, He L, Zhang M, Fu J, Gu Y, et al. (2012) Comparative Genomics of *Helicobacter pylori* Strains of China Associated with Different Clinical Outcome. PLoS ONE 7(6): e38528. doi:10.1371/journal.pone.0038528

**Editor:** Jonathan H. Badger, J. Craig Venter Institute, United States of America

**Received:** July 28, 2011; **Accepted:** May 7, 2012; **Published:** June 6, 2012

**Copyright:** © 2012 You et al. This is an open-access article distributed under the terms of the Creative Commons Attribution License, which permits unrestricted use, distribution, and reproduction in any medium, provided the original author and source are credited.

**Funding:** This research was supported by a grant from the National Key Program for Infectious Diseases of China (No.2008ZX1004-002), China Mega-Project for Infectious Disease (No.2011ZX10004-001) and National Technology R&D Program in the 12th Five year Plan of china (No.2012BAI06B02). The funders had no role in study design, data collection and analysis, decision to publish, or preparation of the manuscript.

**Competing Interests:** The authors have declared that no competing interests exist.

\* E-mail: zhangjianzhong@icdc.cn

## Introduction

*Helicobacter pylori* (*H. pylori*) is a Gram-negative bacterial pathogen responsible for human gastric diseases, including gastritis and peptic ulcers. It is also a major risk factor in the development of gastric cancer [1–3]. In 1994, the World Health Organization listed *H. pylori* as a class I carcinogen.

Previous studies have shown that *H. pylori* has a high rate of homologous gene recombination. Phylogenetic analysis have subdivided *H. pylori* into distinct biogeographic populations and subpopulations with specific geographical distributions that reflect ancient human migrations. The studies also indicated that the East Asian type (hpEastAsia) is classified into at least three subtypes: East Asian (hspEAsia), Pacific (hspMaori) and native American (hspAmerind). The East Asia subtype (hspEAsia) may be related to the high incidence of gastric cancer in East Asia [4–7]. A more recent study demonstrate the East Asian group appear to differ greatly from the European group in electron transfer and redox reactions, which suggest a model of adaptive evolution and selection through proteome diversification and modulation of translational fidelity [8].

A number of studies have focused on the *cag*-pathogenicity island encoded virulence apparatus that may play a critical role in *H. pylori* pathogenesis [9–11]. Importantly, almost all isolates from East Asia harbor the *cag*-PAI island. A few studies have shown that there are specific sequence characteristics shared among these

islands in the various strains, which are responsible for causing different diseases [12–14]. This suggests that genome-wide analyses in various worldwide strains, especially for strains found in East Asia, are necessary. To date, there are thirty-two completed genomes and four draft genomes available on GenBank [15–27]. Genome sizes among clinical isolates of *H. pylori* vary considerably, with some showing differences up to 25% [28,29]. Comparative genomic profiling, using microarrays designed to cover entire genomes, is one strategy that can be used to obtain information about the variability between strains isolated from different patients and locations as well as to indicate horizontal gene transfer. Previously available commercial chips cover only one or two *H. pylori* genomes [30–37]. With more *H. pylori* genome sequences publicly available, it is possible to design high-density microarrays covering all of these fully sequenced genomes. During this study, an additional twenty-six strains associated with different clinical outcomes of various phylogeographic lineages were completely sequenced in the last two years. Additionally, several strains from other countries are also now undergoing sequencing. Here we describe the design and use of a high-density oligonucleotide microarray covering six sequenced *H. pylori* genomes. The performance of this microarray is evaluated, and we illustrate its utility for the hybridization of genomic DNA in order to compare eight uncharacterized *H. pylori* strains to the six established strains. We use this microarray to identify variable

**Table 1.** Characteristics of the 84 *H. pylori* strains studied.

| Origin                | Clinical Diagnosis | No. of strains |
|-----------------------|--------------------|----------------|
| Heilongjiang (n = 23) | GC                 | 12             |
|                       | DU                 | 3              |
|                       | GU                 | 3              |
|                       | AG                 | 3              |
|                       | SG                 | 2              |
| Shandong (n = 12)     | GC                 | 12             |
| Hubei (n = 10)        | FD                 | 6              |
|                       | GU                 | 2              |
|                       | DU                 | 2              |
| Xi'an (n = 11)        | SG                 | 7              |
|                       | DU                 | 1              |
|                       | GDU                | 3              |
| Yunnan (n = 10)       | SG                 | 5              |
|                       | GU                 | 3              |
|                       | DU                 | 2              |
| Jiangxi (n = 18)      | SG                 | 9              |
|                       | GC                 | 9              |

Note: GC, gastric cancer. GU, gastric ulcer. AG, atrophic gastritis, DU, duodenal ulcer, GDU, gastroduodenal ulcer. FD, functional dyspepsia. SG, non-atrophic gastritis.

doi:10.1371/journal.pone.0038528.t001

genomic regions among *H. pylori* strains isolated from patients with different gastroduodenal diseases in a Chinese patient population.

## Materials and Methods

### H. Pylori Strains

*H. pylori* is a well-known pathogen with much genetic variation; both host and bacterial factors may contribute to this fact. Strains isolated from different countries, different geographies, and even different families show genomic diversity [38]. Therefore, from a genomic viewpoint, strain selection has been a critical issue for investigation of the pathogenic mechanism. In this study, we chose eight strains for microarray analysis. This included isolates from 2 patients with chronic superficial gastritis (HLJ220,HLJ215), 2 patients with atrophic gastritis (HLJ193,HLJ256), 2 patients with gastric ulcers (HLJ271,HLJ253), and 2 patients with gastric cancer (HLJ038,HLJ005). The strain numbers were encoded by our lab, Department of Diagnosis for Communicable Diseases, National Institute for Communicable Disease Control and Prevention, China CDC. They were all isolated from Heilongjiang province of China, which reports a high incidence rate of gastric cancer. We used PCR for investigating an additional 76 strains of disease specific genes, which were isolated from seven Chinese provinces. These included thirty-one gastric cancer strains (GC), six gastric ulcer strains (GU), one atrophic gastritis strain (AG), eight duodenal ulcer strains (DU), three gastroduodenal ulcer strains (GDU), six functional dyspepsia strains (FD), and twenty-one non-atrophic gastritis strains (SG). Background information describing these strains is briefly listed in table 1.

### Ethics Statement

All patients involved have given informed consent for the samples to be used in historic or future studies. The consent was written, and ethics approval was obtained from the ethics

**Table 2.** General features of the sequenced *H. pylori* genomes selected for microarray probe design.

| strain | ACCESSION | length  | origin         | Clinical diagnosis |
|--------|-----------|---------|----------------|--------------------|
| 26695  | AE000511  | 1667867 | UK             | Gastritis          |
| J99    | AE001439  | 1643831 | USA            | Duodenal ulcer     |
| HPAG1  | CP000241  | 1596366 | Sweden         | Atrophic gastritis |
| P12    | CP001217  | 1673813 | German         | Duodenal ulcer     |
| G27    | CP001173  | 1652982 | Italy, Tuscany | No known disease   |
| Shi470 | CP001072  | 1608548 | Peru           | Gastritis          |

doi:10.1371/journal.pone.0038528.t002

committee of the Chinese Center for Disease Control and Prevention (China CDC) and the academic committee of the National Institute for Communicable Disease Control and Prevention, China CDC.

### DNA Preparation

Genomic DNA was extracted by using the DNeasy Blood & Tissue Kit (QIAGEN) according to the manufacturer's instructions. The concentration of genomic DNA was adjusted to 120 ng/μl with nuclease-free water and to a volume of 40 μl. DNA was heated in a PCR machine (Biorad, USA) at 95°C for 10 min to obtain DNA fragments with sizes of 100 bp to 600 bp for genomic labeling. The results were visualized by 1% agarose gel electrophoresis.

### Microarray Design, Labeling, Hybridization and Stripping

A whole-genome CombiMatrix tiling CustomArray™ 90 K (Mukilteo, WA, USA) was used in this study. Combimatrix is a highly flexible platform that allows for the synthesis of in situ oligos (35mers) through the use of an electrochemistry-based method. This innovative technology also allows us to reuse the same microarray several times. Traditional cDNA microarrays involve large amounts of primer design and PCR for preparation of amplicon probes to be used for microarray printing. This process can be cumbersome and time consuming. Compared to all other platforms, including cDNA microarray, the Combimatrix drastically reduces fabrication and analytic costs. Thus, this process is more rapid and convenient. The platform has established a complete protocol for genomic analyses from sample labeling to data extraction [39–41]. The array contained 90000 *in situ* synthesized oligonucleotide probes. In total, six sequenced genomes were taken for analysis. Genomic information for each strain is summarized in Table 2. Genome alignments were performed by Combimatrix to obtain strain specific genes of each sequenced strain. We then took the whole genome of P12 as the reference sequence for tiling designation, which occupied about 70000 probes on the 90 k array. The sequences were first broken up into 100,000 bp blocks. We designed all possible probes for every 19 bp and selected the best one for each interval. At each position, a probe was extended until the T<sub>m</sub> reached the desired T<sub>m</sub>. Probes were then tested for quality, and the best probe (probe length 35~40 mer) was chosen. Both strain-specific genes and plasmid genes were then chosen for tiling for the remaining 20000 probes based on the same criteria.

Four micrograms of heated DNA from each *H. pylori* strain was labeled with Cy5-ULS using the Kreatech ULS array CGH Labeling kit (EA-005, Kreatech, Netherlands) according to the manufacturer's instructions and then hybridized to the micro-

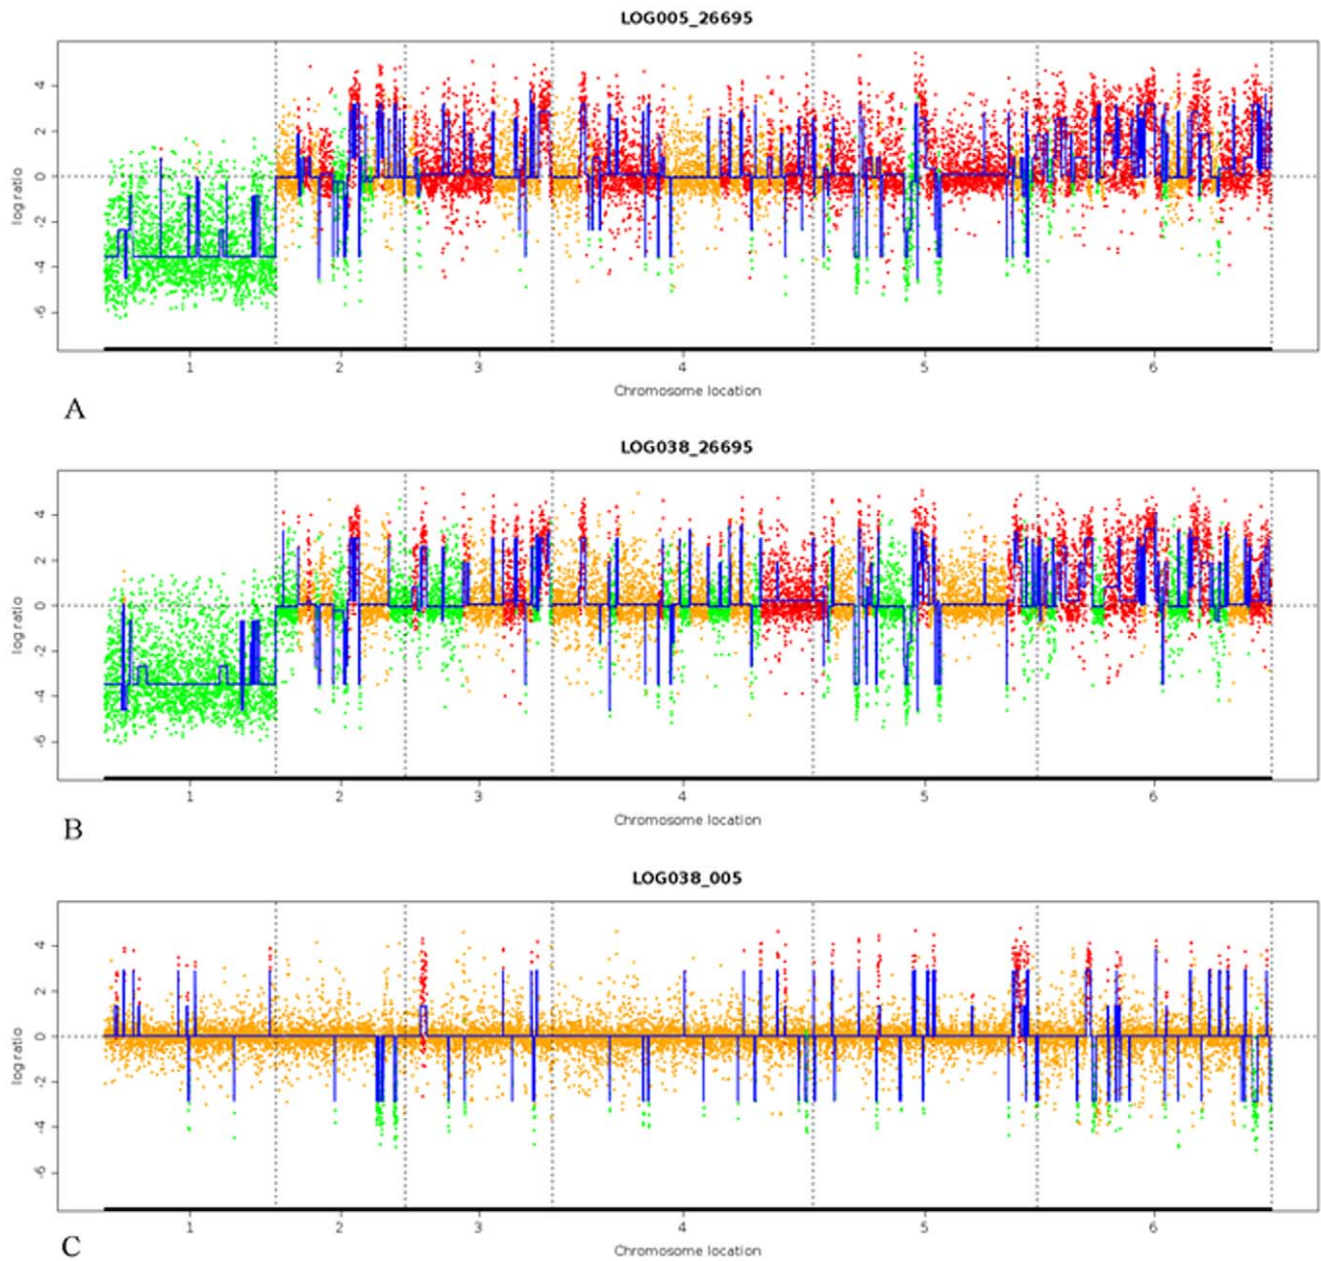

**Figure 1. Comparison of HLJ005, HLJ038, and 26695 based on strain specific genes of the six sequenced genomes.** A. Comparison between HLJ005 and 26695. B. Comparison between HLJ038 and 26695. C. Comparison between HLJ038 and HLJ005. Green spots show inferred loss while orange dots show no changes in the original data. Red spots show inferred increase. Segment 1 on the X-axis: probes of 26695 strain specific genes. Segment 2: probes of G27 strain specific genes. Segment 3: probes of HPAG1 strain specific genes. Segment 4: probes of J99 strain specific genes. Segment 5: probes of P12 strain specific genes. Segment 6: probes of Shi470 strain specific genes. doi:10.1371/journal.pone.0038528.g001

array. Experiments were performed according to CombiMatrix protocol. Microarrays were pre-hybridized with 6×SSPE containing 0.05% Tween-20, 5×Denhardt's solution, and 100 ng salmon sperm DNA for 30 min at 50°C. The Cy5-ULS labeled DNA fragments were then hybridized in the hybridizing solution (6×SSPE and 0.05% SDS) by denaturing at 95°C for 3 min and then incubating for 16 h at 50°C. Post-hybridization wash steps were 6×SSPET for 5 min at 50°C, 3×SSPET for 1 min, 0.5×SSPET for 1 min, and PBST for 1 min at room temperature. After hybridization and imaging, the microarray was stripped using CustomArray™ Stripping Solution. The well known

sequenced strain 26695 and an additional eight strains from Heilongjiang province were hybridized to the chips.

#### Microarray Scanning and Statistical Analysis

Hybridized microarrays were covered with imaging solution and scanned with an Axon GenePix™ 4000B. All of the nine hybridizations were scanned with the same PMT value. The stripped microarray was also scanned with the same PMT gain value (475) to evaluate background noise as well as the stripping efficiency. Data was extracted by using Microarray\_Imager\_5.9.3 software. The foreground median of 635-nm signal intensities of each spot

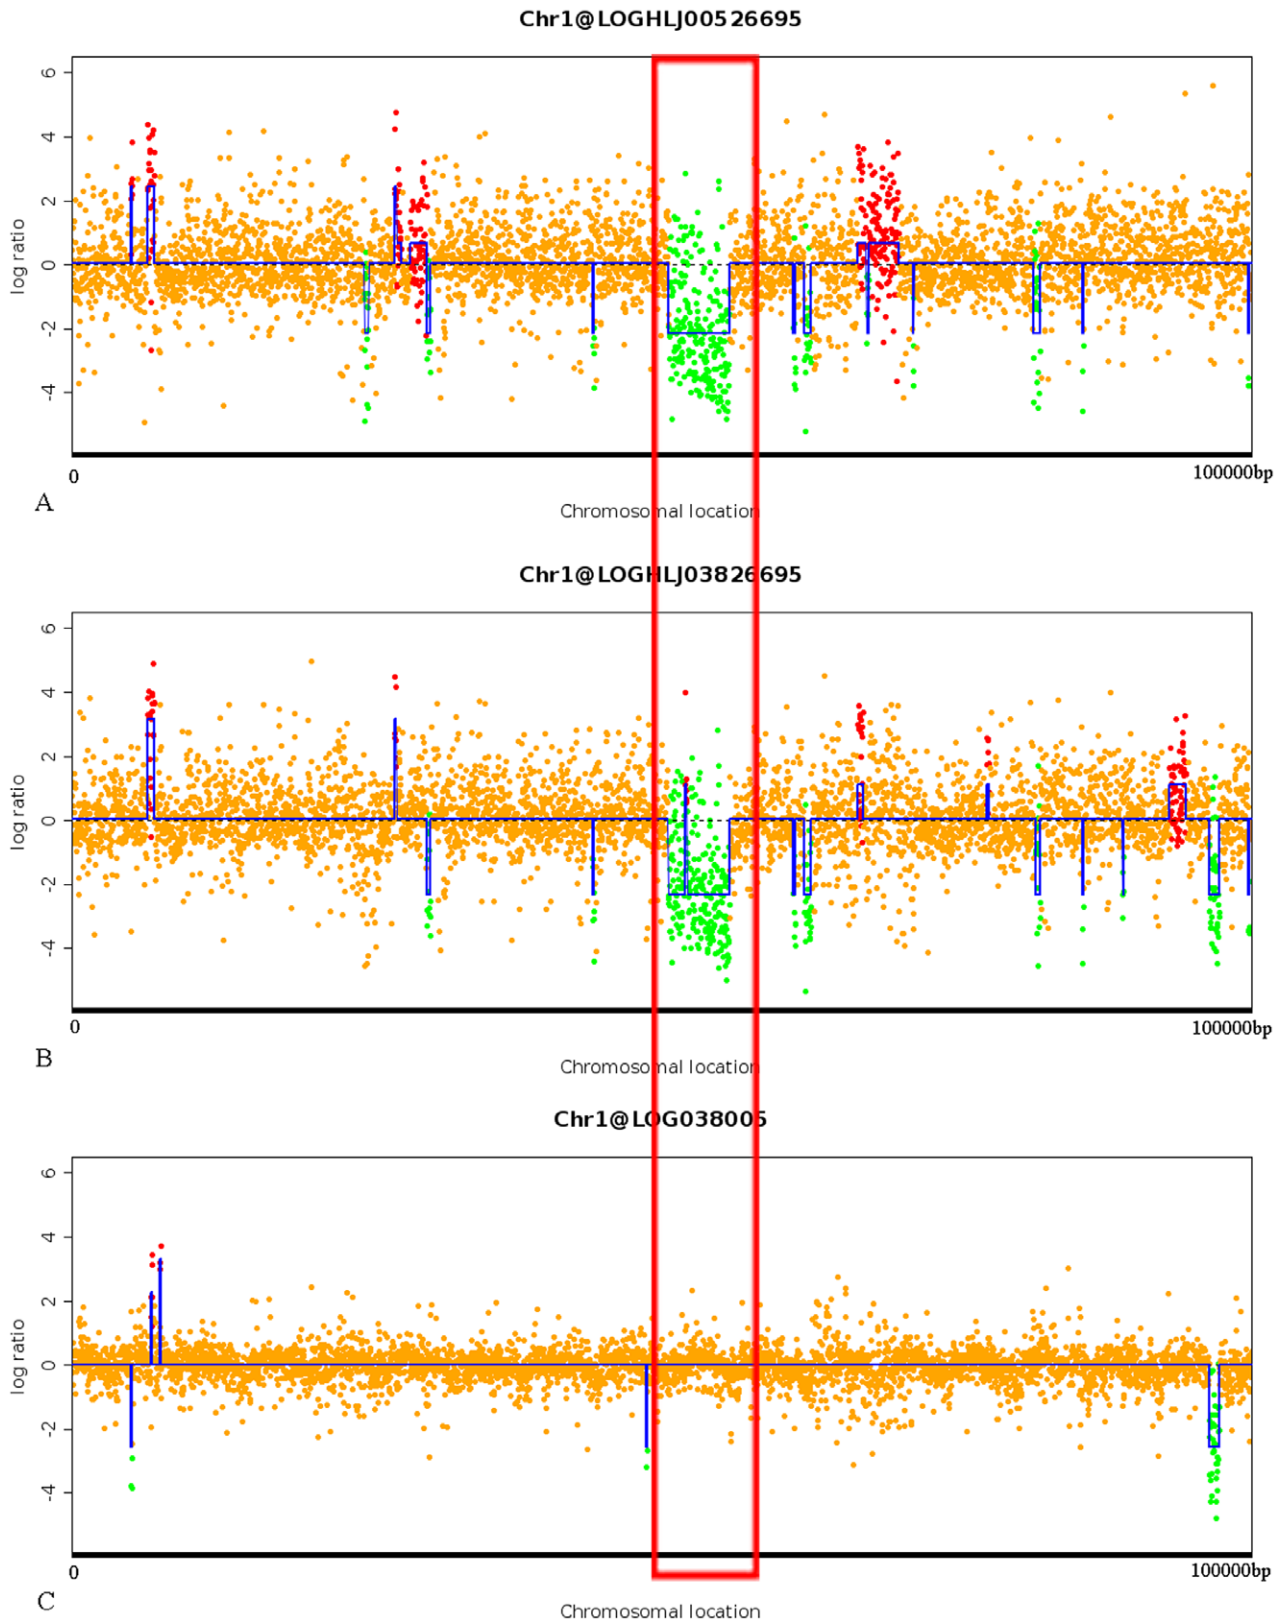

**Figure 2. Comparison of HLJ005, HLJ038, and 26695 based on 0–100 kb of p12 genome.** A. Comparison between HLJ005 and 26695. B. Comparison between HLJ038 and 26695. C. Comparison between HLJ038 and HLJ005. Green spots show inferred loss while orange dots show no changes in the original data. Red spots show inferred increase. The red rectangle indicates the predicted 5.2 kb absent region both in gastric cancer strain HLJ038 and HLJ005 based on the 0–100 kb of the reference P12 chromosome. doi:10.1371/journal.pone.0038528.g002

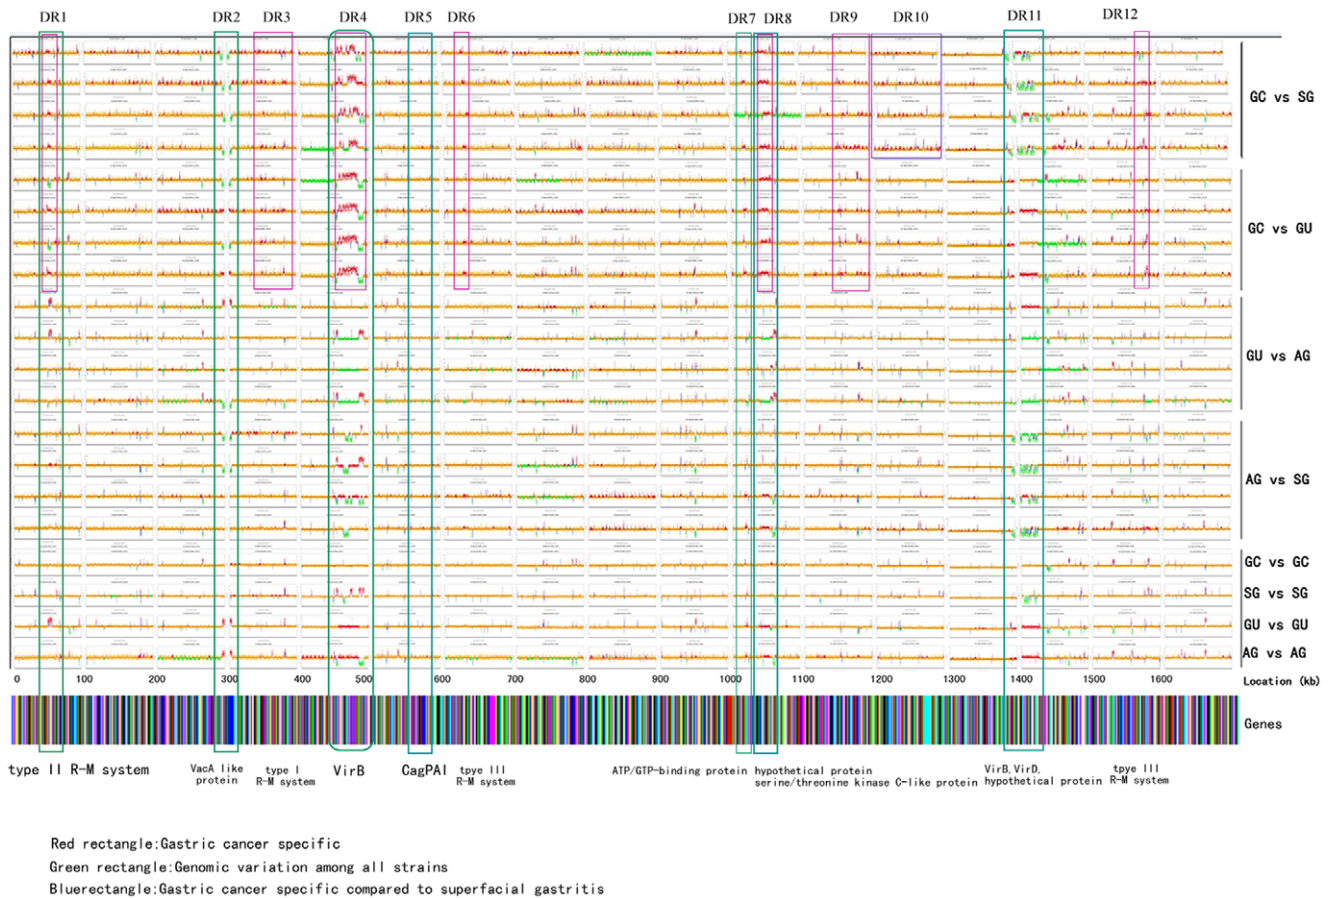

**Figure 3. Genome comparison of eight *H. pylori* strains based on P12 reference sequence.** Large variable regions were labeled with colored rectangles. Predicted gastric cancer strain specific regions were labeled with a red rectangle. General genomic variation among all strains was labeled with a green rectangle. A blue rectangle represents diverse regions obtained from comparison of gastric cancer strains and superficial gastritis strains. Corresponding coding proteins were briefly labeled at the bottom of each rectangle. GC vs SG denotes comparison between the two strains of gastric cancer and the two strains of superficial gastritis. DR, different region.  
 doi:10.1371/journal.pone.0038528.g003

was used for the subsequent analysis. Genes that had at least five contiguous oligonucleotides with a minimum 635-nm intensity of 800 intensity units, and had at least one tile with 635-nm intensity >1200 intensity units were defined as positive. We defined background signal intensity as the median signal intensity of all spots locations that did not have any oligos. QC-oligoB-AS-3 spots were also included in the background. QC-oligoB-AS-3 spots were CombiMatrix quality control oligonucleotides that occur 459 times on the array. Since QC-oligoB-AS-3 does not align to the *H. pylori* genome, these spots could be considered for background calculation for further analysis. On each of the arrays, the background signal was <400 intensity units, indicating that our signal cutoff of 800 was sufficiently above background for identification. Based on the above described criteria for gene identification, information of probe location and corresponding hybridization signals were extracted for further analysis. For ease of analysis, all genes were separated into two independent files, one including genes located in the *H. pylori* P12 genome and another including strain specific genes in each of the other strains, which are named chromosome 1–6 (this also included P12 strain specific genes). Isolates of gastric cancer were represented as GC, isolates of gastric ulcers were represented as GU, isolates of chronic superficial gastritis were represented as SG, and isolates of atrophic gastritis were represented as AG. Signal comparison

was performed between the two strains in GC, GU, SG, and AG. Comparison was also performed by GC vs GU, GU vs AG, GC vs SG, and AG vs SG. Signal ratios of two hybridized strains were log<sub>2</sub> transformed and imported into a web tool ADaCGH, which was used for the analysis of microarray datasets to show gains and losses of genes between the two genomes. The data was centered and segmented in ADaCGH by employing a position-dependent segmentation algorithm CBS (circular binary segmentation) to partition data points into absent, present, and no change sequence segments [42,43]. Chi-square was used to analyze the association of genes with disease by comparing one disease group (i.e., GC) with the other two groups (i.e., SG and GU), as well as to analyze the TFSS gene distributions among different disease groups. P value <0.05 was considered significant.

**Microarray Data Deposition**

MIAME compliant microarray data of this study has been deposited at the Gene Expression Omnibus database (GEO, <http://www.ncbi.nlm.nih.gov/geo/>) under series accession number GSE32107.

**Validation of genes associated with diseases by PCR**

The results for some variable genes found to be associated with diseases by microarray analysis were confirmed using gene-specific

**Table 3.** Predicted variable genomic region based on reference genome P12.

| DR  | Gene     | start  | end    | Gene description                            |
|-----|----------|--------|--------|---------------------------------------------|
| DR1 |          | 49177  | 49869  | adenine specific DNA methyltransferase      |
|     |          | 49866  | 50933  | cytosine specific DNA methyltransferase     |
|     |          | 50930  | 52153  | restriction endonuclease                    |
|     |          | 52297  | 53568  | type II R-M system restriction endonuclease |
|     |          | 53568  | 56036  | type II R-M system methyltransferase        |
| DR2 |          | 295040 | 303760 | vacuolating cytotoxin VacA-like protein     |
| DR4 | hsdS-1   | 448002 | 449183 | type I R-M system S protein                 |
|     | hsdM-1   | 449176 | 450807 | type I R-M system M protein                 |
|     |          | 452423 | 453496 | integrase/recombinase XercD family          |
|     |          | 453578 | 454261 | hypothetical protein                        |
|     | virb6    | 454334 | 455632 | VirB6 type IV secretion protein             |
|     |          | 455598 | 455876 | hypothetical protein                        |
|     |          | 455928 | 457328 | hypothetical protein                        |
|     |          | 457332 | 457577 | hypothetical protein                        |
|     |          | 457791 | 459272 | hypothetical protein                        |
|     |          | 459405 | 460469 | hypothetical protein                        |
|     |          | 460312 | 460803 | hypothetical protein                        |
|     |          | 460810 | 461832 | hypothetical protein                        |
|     |          | 462096 | 470522 | DNA methylase                               |
|     | parA     | 470785 | 471441 | chromosome partitioning protein             |
|     |          | 471523 | 471807 | hypothetical protein                        |
|     |          | 471839 | 473017 | hypothetical protein                        |
|     | virD2-1  | 473042 | 474955 | relaxase                                    |
|     |          | 475253 | 475567 | hypothetical protein                        |
|     |          | 475560 | 475841 | hypothetical protein                        |
|     | virD4-1  | 476105 | 477832 | VirD4 coupling protein                      |
|     |          | 477879 | 478391 | hypothetical protein                        |
|     |          | 478392 | 478682 | hypothetical protein                        |
|     |          | 478679 | 479134 | hypothetical protein                        |
|     | virB11-1 | 479131 | 480072 | VirB11 type IV secretion ATPase             |
|     |          | 480072 | 480371 | hypothetical protein                        |
|     |          | 480368 | 480631 | hypothetical protein                        |
|     |          | 480624 | 480917 | hypothetical protein                        |
|     | virB10-1 | 480987 | 482252 | VirB10 type IV secretion protein            |
|     | virB9-1  | 482252 | 483784 | VirB9 type IV secretion protein             |
|     | virB8-1  | 483784 | 484953 | VirB8 type IV secretion protein             |
|     | virB7-1  | 484957 | 485073 | VirB7 type IV secretion protein             |
|     | virB3-1  | 489522 | 489788 | VirB3 type IV secretion protein             |
|     | virB2-1  | 489789 | 490091 | VirB2 type IV secretion protein             |
|     |          | 490088 | 490372 | hypothetical protein                        |
|     |          | 490433 | 491611 | hypothetical protein                        |
|     |          | 491618 | 491911 | hypothetical protein                        |
|     |          | 491931 | 492710 | hypothetical protein                        |
|     |          | 494743 | 496638 | hypothetical protein                        |
|     |          | 496664 | 497431 | hypothetical protein                        |
|     |          | 497441 | 497791 | integral membrane protein                   |
|     | virb6    | 454334 | 455632 | VirB6 type IV secretion protein             |
|     |          | 455598 | 455876 | hypothetical protein                        |

**Table 3.** Cont.

| DR   | Gene     | start   | end     | Gene description                                    |
|------|----------|---------|---------|-----------------------------------------------------|
|      |          | 455928  | 457328  | hypothetical protein                                |
|      |          | 457332  | 457577  | hypothetical protein                                |
| DR6  | res-1    | 628179  | 631121  | type III R-M system restriction enzyme              |
| DR8  |          | 1050977 | 1051564 | serine/threonine kinase C-like protein              |
|      |          | 1051604 | 1052053 | serine/threonine kinase C-like protein              |
|      |          | 1052213 | 1052728 | serine/threonine phosphatase 2C-like protein        |
| DR11 | virB2-2  | 1396323 | 1396607 | VirB2 type IV secretion protein                     |
|      | virB3-2  | 1396619 | 1396882 | VirB3 type IV secretion protein                     |
|      |          | 1396894 | 1397130 | hypothetical protein                                |
|      | virB4-2  | 1397130 | 1399706 | VirB4 type IV secretion ATPase                      |
|      | virB7-2  | 1399703 | 1399843 | VirB7 type IV secretion protein                     |
|      | virB8-2  | 1399836 | 1400972 | VirB8 type IV secretion protein                     |
|      | virB9-2  | 1400969 | 1402624 | VirB9 type IV secretion protein                     |
|      | virB10-2 | 1402591 | 1403829 | VirB10 type IV secretion protein                    |
|      |          | 1403813 | 1405597 | hypothetical protein                                |
|      |          | 1405501 | 1406055 | hypothetical protein                                |
|      |          | 1406068 | 1407030 | hypothetical protein                                |
|      |          | 1407047 | 1407322 | hypothetical protein                                |
|      | virB11-3 | 1407327 | 1408271 | VirB11 type IV secretion ATPase                     |
|      |          | 1408268 | 1408786 | hypothetical protein                                |
|      | virD4-2  | 1408783 | 1411026 | VirD4 coupling protein                              |
|      |          | 1413163 | 1413633 | hypothetical protein                                |
|      |          | 1413603 | 1414406 | hypothetical protein                                |
|      |          | 1414480 | 1415145 | hypothetical protein                                |
|      |          | 1415123 | 1415401 | hypothetical protein                                |
|      |          | 1415334 | 1415765 | hypothetical protein                                |
|      |          | 1415750 | 1416160 | hypothetical protein                                |
|      |          | 1416165 | 1416794 | hypothetical protein                                |
|      |          | 1416897 | 1417178 | hypothetical protein                                |
|      |          | 1417399 | 1417788 | hypothetical protein                                |
|      |          | 1417796 | 1418086 | hypothetical protein                                |
|      |          | 1418215 | 1418466 | hypothetical protein                                |
|      |          | 1418394 | 1419248 | hypothetical protein                                |
|      |          | 1421131 | 1421259 | hypothetical protein                                |
|      | virD2-2  | 1421785 | 1423818 | relaxase                                            |
| DR12 |          | 1575820 | 1579728 | type IIS R-M system restriction/modification enzyme |
|      |          | 1580020 | 1582023 | hypothetical protein                                |
|      | res-4    | 1582157 | 1585066 | type III R-M system restriction enzyme              |
|      | mod-5    | 1585069 | 1587111 | type III R-M system methyltransferase               |

Note: DR, different region  
doi:10.1371/journal.pone.0038528.t003

PCR. We preliminarily selected 25 such genes involved in two TFSS systems, a predicted 5.2 kb variable region, and an *hrgA* gene, which was reported to have a high occurrence rate in strains isolated from gastric cancer patients in East Asia. Specific primers were selected based on the sequences of these genes. To investigate the distribution of genes that were predicted as genomic distinctive regions, eighty-four strains were selected for PCR analysis of the

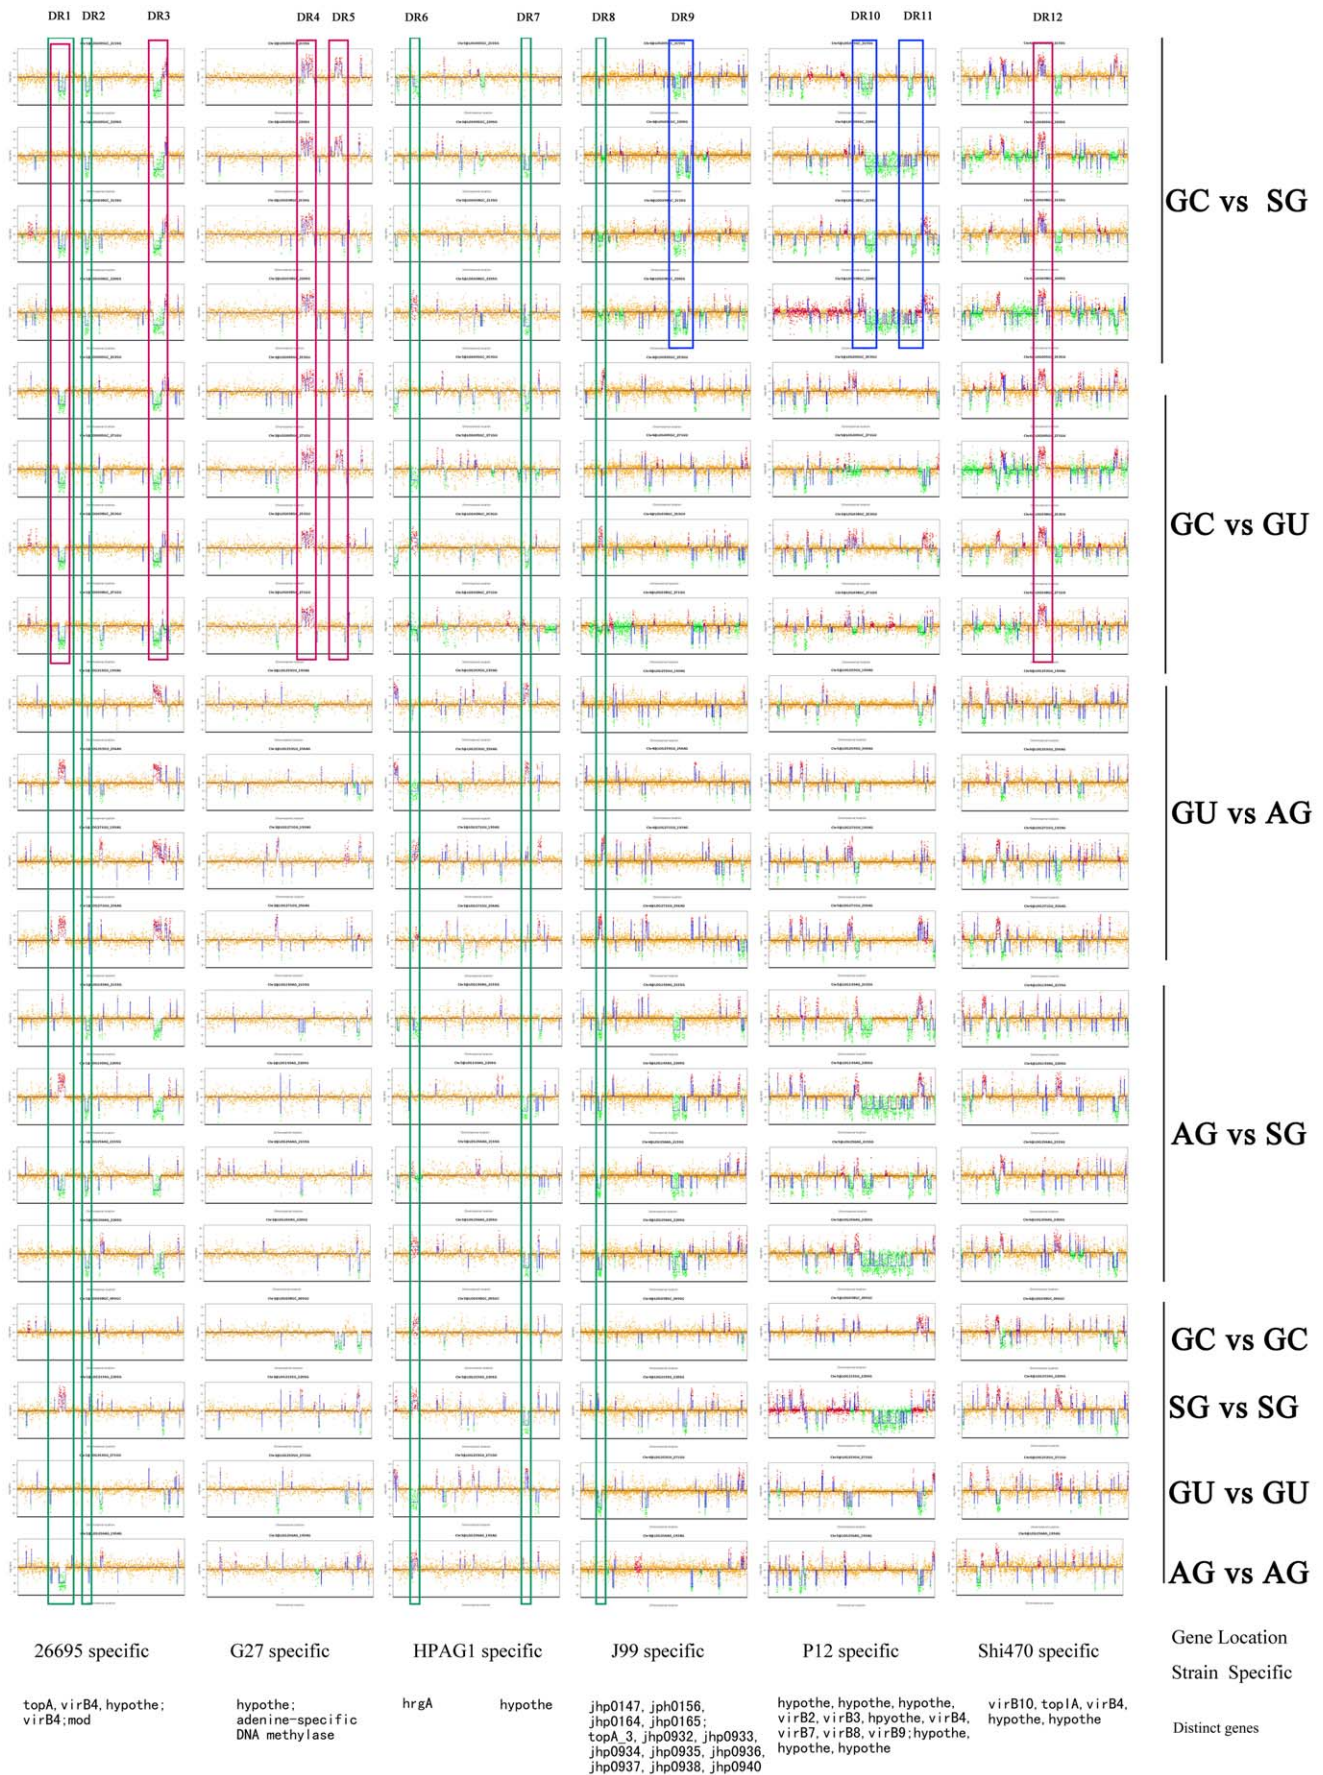

**Figure 4. Comparison of eight *H. pylori* strains based on strain specific genes of six sequenced strains.** Large variable regions were labeled with colored rectangles. Predicted gastric cancer strain specific regions were labeled with a red rectangle. General genomic variations among all strains were labeled with a green rectangle. A blue rectangle represents diverse regions obtained from comparison of gastric cancer strains and superficial gastritis strains. Corresponding coding proteins were briefly labeled at the bottom of each rectangle. GC vs SG denotes comparison between the two strains of gastric cancer and the two strains of superficial gastritis.  
doi:10.1371/journal.pone.0038528.g004

25 genes. A heatmap of type IV systems genes was created using *Mev\_4\_0-2*.

## Results

### Microarray Hybridization and Statistical Analysis

In order to test whether the established *H. pylori* microarray analysis system can accurately predict genomic distinction, we first analyzed strains 26695, HLJ005, and HLJ038 based on strain specific genes and 0–100 kb of the reference P12 genome sequence. As shown in Figure 1, six segments on the X-axis represent strain specific genes of the six sequenced genomes. Probes of segment one are strain specific genes of 26695. When comparing the hybridization signal of gastric cancer strain HLJ005 to 26695 with the web tool ADAcGH, almost all of these genes were predicted to be absent in HLJ005 (Figure 1 A). The same pattern was found in another gastric cancer strain HLJ038 (Figure 1 B). When comparing HLJ005 and HLJ038, only some minor variable probes were found in the six segments (Figure 1 C). These analyses indicate that this custom designed microarray platform accurately predicts gene absence or presence in different clinical *H. pylori* isolates. This was further validated by PCR to confirm a predicted 5.2 kb absent region both in gastric cancer strain HLJ038 and HLJ005 based on the 0–100 kb of the reference P12 chromosome (Figure 2).

Variable genes of the tested strains were first obtained based on the reference P12 genome sequence (Figure 3, Table 3). Twelve genomic regions with the most variable tiles among the eight strains are marked by a rectangle. Predicted gastric cancer strain specific regions were labeled with a red rectangle according to the comparison of GC vs SG and GC vs GU. Seven such areas were acquired, and encoded proteins were listed in Table 3 (DR1, 3, 4, 6, 8, 9, 12). The number of these variable genes present in the group of gastric cancer strains was statistically higher than those for the GU and SG strains ( $P < 0.05$ ). These regions mainly coded for proteins related to the type I R-M system, type II R-M system, type III R-M system, TFSS system, and hypothetical proteins. General genomic variations among all strains were labeled with a green rectangle. Seven such regions were identified (DR 1, 2, 4, 5, 7, 8, 11). No significant correlation was found for the unique absence or presence of TFS4 or TFS3. However, absence of both TFS3 and TFS4 system genes display significant variation comparing GC strains to GU, DU, or SG strains ( $P < 0.05$ ). Among the 25 strains that are absent for these two systems, 17 strains are GC strains (68%). No significant variation was found for the association of any gene cluster with special geography. In addition, *cagPAI* was also labeled with a green rectangle for its diversity among reported strains (DR5). However, *cagPAI* were conserved among the tested strains of this study. The blue rectangle represents diverse regions obtained from comparison of gastric cancer strain with superficial gastritis strain (DR10). Some of the corresponding coding proteins were briefly labeled at the bottom of each rectangle. GC vs SG denotes comparison among the two strains of gastric cancer and the two strains of superficial gastritis.

Comparison of eight *H. pylori* strains based on strain specific genes of six sequenced strains is shown in Figure 4. Twelve large

variable regions are labeled with rectangles, including five red rectangles denoting predicted gastric cancer strain specific regions (DR1, 3, 4, 5, 12), three blue rectangles denoting diverse regions obtained from comparison of gastric cancer strains and superficial gastritis strains (DR 9, 10, 11), and five green rectangles denoting common variable genes among all strains (DR 1, 2, 6, 7, 8). These predicted variable genes based on strain specific genes of the six sequenced strains were listed in Table 4.

### Gene Variation Confirmed by PCR

To further validate the microarray results, we performed PCR to confirm a predicted 5.2 kb absent region both in gastric cancer strain HLJ038 and HLJ005 based on the 0–100 kb of the reference P12 chromosome (Figure 2 A B). PCR results validated that the 5.2 kb region is absent in the two gastric cancer strains but present in 26695 (data not shown). As shown in Figure 2C, comparing 0–100 kb of HLJ005 and HLJ038 shows minor differences between the two GC strains. These scattered differing genes are suspected to be strain-specific genes of HLJ005 and HLJ038.

A heatmap of variable genes detected among the three *H. pylori* test strains was also confirmed using PCR. Green denotes absence of genes; red indicates presence of genes. The distinct regions of the three test strains were clustered with a dendrogram, which was constructed by hierarchical analysis of the presence or absence of genes. Amplification of some genes showing a weak PCR product band or a band of incorrect size are represented in black. One possible explanation for this is that sequence variation in these genes occurs in the primer binding region. The twenty variable genes of the TFSS3 and TFSS4 in the eight GC isolates observed by ADAcGH were confirmed by PCR, showing concordance with the microarray data. The prevalence of these genes in isolates from 76 additional patients was tested by PCR (Figure 5). These genes were found to be absent in 18 of 33 GC strains (55%). Other strains harbor two or more of these gene. These data support the association of the loss of these genes in isolates from GC patients.

## Discussion

In the eight Chinese isolates studied by microarray, we found 14 significant variable regions when comparing GC isolates to SG or GU isolates based on the P12 reference genome (Figure 3, Table 2). These regions mainly coded for proteins related to the type I R-M system (DR3), type II R-M system (DR1), type III R-M system (DR6, DR12), TFSS system (DR4, DR11), and hypothetical proteins (DR8). These findings are consistent to those of previous reports. Previous research found a remarkable variety of restriction-modification (R-M) systems in *H. pylori*. Bacteria utilize R-M systems through conjugative plasmids or bacteriophages as a defense against invasion by foreign DNA. Recently, restriction-modification systems have been reported to be associated with *H. pylori* virulence. The best understood R-M system is the type II R-M family. Type II R-M systems include two enzymes: one is a restriction endonuclease which cleaves DNA within a specific 4–8-bp sequence, while another is a methyltransferase which can specifically methylate DNA at adenine or cytosine residues. Bacteria can protect DNA from cleavage through this mechanism [44–48]. We identified a number of



**Table 4.** Predicted variable genes based on strain specific genes of the six sequenced strains.

| Strain                      | DR      | Gene    | start                          | end                              | Gene description                               |
|-----------------------------|---------|---------|--------------------------------|----------------------------------|------------------------------------------------|
| 26695 strain specific genes | DR1     | HP0440  | 457297                         | 459330                           | DNA topoisomerase I (topA)                     |
|                             |         | HP0441  | 459333                         | 459333                           | VirB4 homolog                                  |
|                             |         | HP0442  | 461749                         | 462015                           | hypothetical protein                           |
|                             |         | HP0443  | 462016                         | 462318                           | hypothetical protein                           |
|                             |         | HP0444  | 462315                         | 461756                           | hypothetical protein                           |
|                             | DR2     | HP0445  | 463954                         | 464139                           | hypothetical protein                           |
|                             |         | HP0456  | 475056                         | 475508                           | hypothetical protein                           |
|                             |         | HP0457  | 475826                         | 476089                           | hypothetical protein                           |
|                             |         | HP0458  | 476101                         | 476337                           | hypothetical protein                           |
|                             |         | HP0459  | 476337                         | 478913                           | virB4 homolog (virB4)                          |
| G27 strain specific genes   | DR3     | HP0460  | 479043                         | 479531                           | hypothetical protein                           |
|                             |         | HP0461  | 479557                         | 479649                           | hypothetical protein                           |
|                             | DR4     | HP0462  | 480062                         | 481159                           | type I restriction enzyme S protein (hsdS)     |
|                             |         | HP1366  | 1427688                        | 1428959                          | type IIS restriction enzyme R protein (MBOIIR) |
|                             |         | HP1367  | 1428975                        | 1429757                          | type IIS restriction enzyme M1 protein (mod)   |
|                             | DR5     | HP1368  | 1429744                        | 1430607                          | type IIS restriction enzyme M2 protein (mod)   |
|                             |         | 1046540 | 1048216                        | 1048734                          | hypothetical protein                           |
| HPAG1 strain Specific genes | DR6     | 1048432 | 1048734                        | hypothetical protein             |                                                |
|                             |         | 1053564 | 1054550                        | competence protein               |                                                |
|                             | DR7     | 1076345 | 1077382                        | hypothetical protein             |                                                |
|                             |         | 1081055 | 1082440                        | hypothetical protein             |                                                |
|                             |         | 1082440 | 1083642                        | hypothetical protein             |                                                |
| DR8                         | 1083705 | 1084781 | integrase-recombinase protein  |                                  |                                                |
|                             | 1351624 | 1352001 | adenine-specific DNA methylase |                                  |                                                |
| J99 strain Specific genes   | DR8     | 1419432 | 1420331                        | adenine-specific DNA methylase   |                                                |
|                             |         | HrgA    | 94738                          | 95736                            | HrgA                                           |
| P12 strain Specific genes   | DR9     | 1410157 | 1412718                        | hypothetical protein             |                                                |
|                             |         | jhp0164 | 178219                         | 179565                           | putative restriction enzyme                    |
|                             | DR10    | jhp0165 | 179558                         | 180778                           | hypothetical protein                           |
|                             |         | jhp0929 | 1032025                        | 1032477                          | hypothetical protein                           |
|                             |         | jhp0930 | 1032591                        | 1032833                          | hypothetical protein                           |
|                             |         | topA_3  | 1032846                        | 1034906                          | topoisomerase I                                |
|                             |         | jhp0932 | 1034961                        | 1035431                          | hypothetical protein                           |
|                             |         | jhp0933 | 1035401                        | 1036204                          | hypothetical protein                           |
|                             |         | jhp0934 | 1036277                        | 1037296                          | hypothetical protein                           |
|                             |         | jhp0935 | 1037343                        | 1037885                          | hypothetical protein                           |
| jhp0936                     | 1038083 | 1038616 | hypothetical protein           |                                  |                                                |
| jhp0937                     | 1038613 | 1039878 | hypothetical protein           |                                  |                                                |
| P12 strain Specific genes   | DR10    | virB2-2 | 1396323                        | 1396607                          | VirB2 type IV secretion protein                |
|                             |         | virB3-2 | 1396619                        | 1396882                          | VirB3 type IV secretion protein                |
|                             | virB4-2 | 1396894 | 1397130                        | hypothetical protein             |                                                |
|                             |         | 1397130 | 1399706                        | VirB4 type IV secretion ATPase   |                                                |
|                             |         | 1399703 | 1399843                        | VirB7 type IV secretion protein  |                                                |
|                             |         | 1399836 | 1400972                        | VirB8 type IV secretion protein  |                                                |
|                             |         | 1400969 | 1402624                        | VirB9 type IV secretion protein  |                                                |
|                             |         | 1402591 | 1403829                        | VirB10 type IV secretion protein |                                                |
|                             |         | 1403813 | 1405597                        | hypothetical protein             |                                                |

**Table 4.** Cont.

| Strain         | DR   | Gene     | start   | end     | Gene description                            |
|----------------|------|----------|---------|---------|---------------------------------------------|
|                |      |          | 1405501 | 1406055 | hypothetical protein                        |
|                |      |          | 1406068 | 1407030 | hypothetical protein                        |
|                |      |          | 1407047 | 1407322 | hypothetical protein                        |
|                |      | virB11-3 | 1407327 | 1408271 | VirB11 type IV secretion ATPase             |
|                |      |          | 1408268 | 1408786 | hypothetical protein                        |
|                |      | virD4-2  | 1408783 | 1411026 | VirD4 coupling protein                      |
|                |      |          | 1413163 | 1413633 | hypothetical protein                        |
|                |      |          | 1413603 | 1414406 | hypothetical protein                        |
|                |      |          | 1414480 | 1415145 | hypothetical protein                        |
|                |      |          | 1415123 | 1415401 | hypothetical protein                        |
|                |      |          | 1415334 | 1415765 | hypothetical protein                        |
|                |      |          | 1415750 | 1416160 | hypothetical protein                        |
|                |      |          | 1416165 | 1416794 | hypothetical protein                        |
|                |      |          | 1416897 | 1417178 | hypothetical protein                        |
|                |      |          | 1417399 | 1417788 | hypothetical protein                        |
|                |      |          | 1417796 | 1418086 | hypothetical protein                        |
|                |      |          | 1418215 | 1418466 | hypothetical protein                        |
|                |      |          | 1418394 | 1419248 | hypothetical protein                        |
|                |      |          | 1421131 | 1421259 | hypothetical protein                        |
|                |      | virD2-2  | 1421785 | 1423818 | relaxase                                    |
|                | DR11 |          | 1466136 | 1466765 | hypothetical protein                        |
|                |      |          | 1470038 | 1471000 | type II R-M system restriction endonuclease |
|                |      |          | 1470981 | 1471751 | type II R-M system restriction endonuclease |
|                |      |          | 1479129 | 1479917 | hypothetical protein                        |
|                |      |          | 1486667 | 1487452 | hypothetical protein                        |
|                |      |          | 1487452 | 1489119 | hypothetical protein                        |
|                |      |          | 1492159 | 1492494 | hypothetical protein                        |
|                |      |          | 1507434 | 1507625 | hypothetical protein                        |
|                |      |          | 1524027 | 1526738 | DNA polymerase I                            |
|                |      |          | 1528042 | 1530078 | type IIS R-M system methyltransferase       |
|                |      |          | 1555145 | 1556065 | hypothetical protein                        |
| Shi470 strain  | DR12 |          | 874998  | 876074  | integrase/recombinase (xerD)                |
| Specific genes |      |          | 876139  | 877341  | hypothetical protein                        |
|                |      |          | 877341  | 878726  | hypothetical protein                        |
|                |      |          | 880915  | 882183  | hypothetical protein                        |
|                |      |          | 882184  | 883221  | hypothetical protein                        |
|                |      |          | 883375  | 891786  | hypothetical protein                        |
|                |      |          | 902243  | 903478  | ComB3 protein                               |
|                |      |          | 906132  | 908066  | topoisomerase I                             |
|                |      |          | 908059  | 910557  | DNA transfer protein                        |
|                |      |          | 910570  | 910830  | hypothetical protein                        |
|                |      |          | 910831  | 911133  | hypothetical protein                        |
|                |      |          | 911758  | 913038  | hypothetical protein                        |
|                |      |          | 913049  | 913813  | hypothetical protein                        |
|                |      |          | 913835  | 915454  | hypothetical protein                        |

Note: DR, different region.  
doi:10.1371/journal.pone.0038528.t004

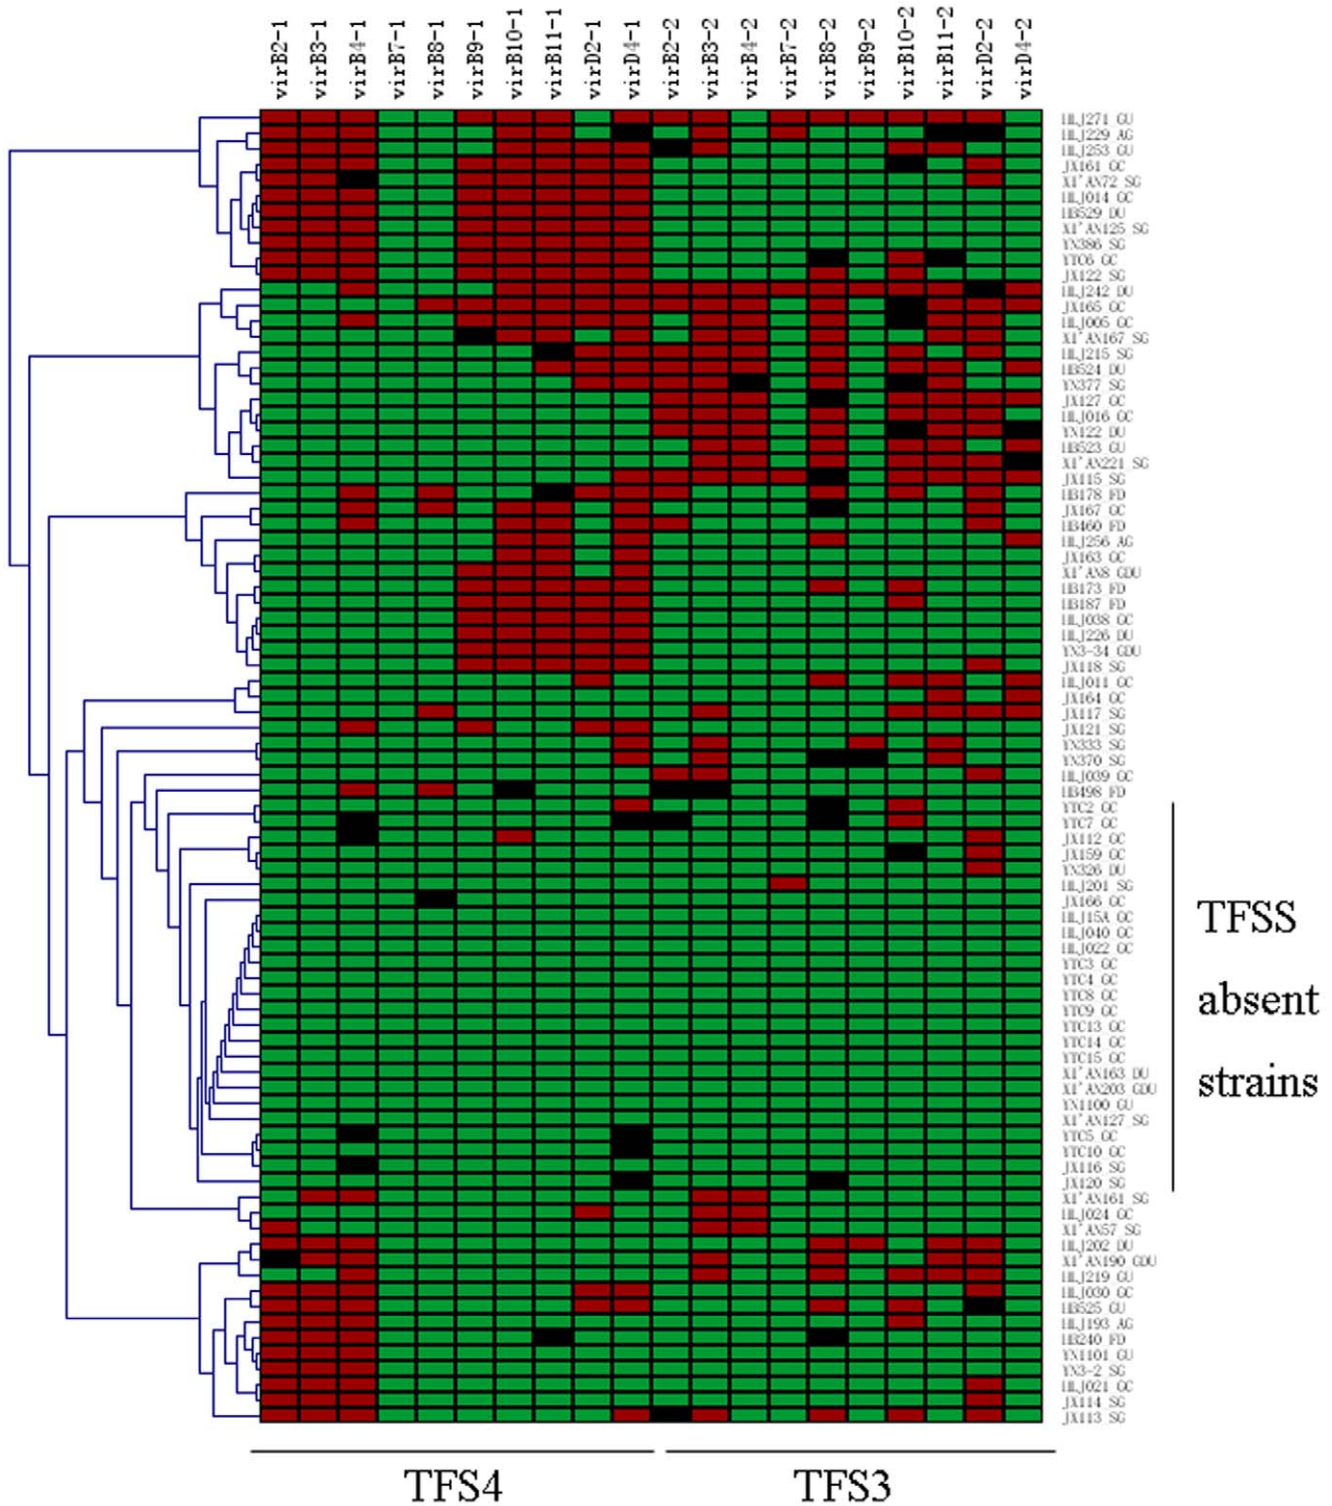

**Figure 5. Gene content analysis of TFS4 and TFS3 in eighty-four *H. pylori* isolates by PCR.** The presence of individual genes is indicated in red, and their absence in green. Non-specific amplicon is shown in black. doi:10.1371/journal.pone.0038528.g005

variable genes involved in these restriction-modification systems among the microarray tested strains. The results indicate a strong correlation between *H. pylori* R-M system and pathogenesis of gastric cancer. Further investigations involved in functional

analysis of the R-M system are very necessary to demonstrate the potential mechanism.

A previous Chinese study, performed by Han, Y. H. et al, also analyzed the genomic variation of *H. pylori* isolates from patients

**Table 5.** Distribution of *hrgA* in different diseases.

| Diseases | <i>hrgA</i> |    | Total |
|----------|-------------|----|-------|
|          | +           | –  |       |
| GC       | 25          | 8  | 33    |
| GU       | 5           | 2  | 7     |
| DU       | 4           | 4  | 8     |
| GDU      | 0           | 4  | 4     |
| SG       | 9           | 14 | 23    |
| AG       | 1           | 2  | 3     |
| FD       | 3           | 3  | 6     |
| Total    | 47          | 37 | 84    |

Note: GC, gastric cancer. GU, gastric ulcer. AG, atrophic gastritis, DU, duodenal ulcer GDU, gastroduodenal ulcer, FD, functional dyspepsia, SG, non-atrophic gastritis.

doi:10.1371/journal.pone.0038528.t005

with gastroduodenal diseases [34]. They found two diverse regions in the *H. pylori* genome that corresponded to plasticity zones (PZ) 1 and 2. Our results are partially consistent with one diverse region of their findings. This region comprises genes from HP0424 to HP0462. However in our study, we only identified genes in these regions from HP0440 to HP0445 and HP0456 to HP0462. For diverse region 2 from HP0984 to HP1009, we have not observed wide variation among our strains except for a minor difference of HP0993 and HP0994, which are predicted to be absent in GC strains HLJ005 and HLJ038 compared to the SG strain HLJ220. In addition to these distinctions, we found the other diverse region among strains based on 26695 strain specific genes. They are from HP1366 to HP1368 and encode type IIS restriction enzyme related proteins. For the other genes that were found by Han, Y. H. et al, such as HP0447, HP0704, and jhp0918, they claimed that certain genotypes had higher prevalence of these genes in DU or GC groups than in CG groups, but this was not inspected in our microarray that studied eight Heilongjiang province strains. These discrepancies may be due to the differences in strain selection. It is also possible that technical differences contribute to the discrepancies observed. Another previous comparative genomic study reported that genes located in the plasticity zones such as jhp0947 and jhp0949 are associated with disease [49–51]. For these genes, we also detected a small scattered variable region among the eight microarray tested strains. But we have not performed PCR tests in more strains for these genes. In the future, we will follow this work up with systematic analysis. Despite these variable genes described above, we found that the *cag* PAI was significantly conserved in the eight tested isolates from Heilongjiang province, which is consistent with the fact that *cag* PAI is geographically diverse.

The distribution of genes of type-IV secretion systems in Chinese isolates were also investigated in detail. *H. pylori* have at least three type-IV secretion systems (TFSS). The first type IV secretion system gene cluster is located in the *cag* pathogenicity island, which mediates the injection of the toxin CagA and is thought to be the most important apparatus that contributes to pathogenesis. Several studies have described and discussed the role of the *cag*-pathogenicity island encoded type IV secretion system in *H. pylori* pathogenesis [9–11]. However, the potential mechanism for *cag* PAI induced cancer is still under known. The second gene cluster is involved in a *comB* locus that confers competence for DNA transformation [52]. Recently, a third TFSS responsible for DNA conjugation has been demonstrated and discussed in various

studies. This TFSS system helps *H. pylori* rapidly acquire new genetic features and adapt to changes in the environment [53–56]. We explored genes involving two such TFSS systems of P12 in our study. Consistent with previous studies, many genes in these systems are variably present (Figure 5). Although complete TFS3 or TFS4 type IV secretion systems were found in some strains (i.e., HLJ242), partial absence of type IV secretion system genes seem to be more common. None of the tested strains harbored the two TFSS system genes despite a possible failure to amplify *virB7-1*. All of our tested strains did not contain *virB7-1*; this is probably because the length of *virB7-1* is only 117 bp. Therefore, it is difficult to design a pair of primers that efficiently amplify this gene target. Although no significant correlation was found for the unique absence or presence of TFS4 or TFS3, absence of both TFS3 and TFS4 system genes displayed significant variation comparing GC strains to GU, DU, or SG strains ( $P < 0.05$ ). It is intriguing that large proportions of GC strains in our study lost these two systems, which are reported to be involved in the transfer of genomic fragments and the restriction-modification system through a special mechanism. More thorough research is required to explore the potential function or mechanism for losing TFSS systems in GC isolates.

We also found one of the four genes with the 5.2 kb predicted variable segment, a gene encoding cytosine specific DNA methyltransferase, is present in 11 of 12 GC strains isolated from Shandong province (represented as YTC). This suggests that special genomic characteristics may exist in this group of strains. Based on the strain specific genes of the six sequenced genomes, several variable genes were identified including an *hrgA* gene (Figure 4, Table 3, DR6), which has been previously reported to be a strain-specific gene that might be associated with gastric cancer among *H. pylori* isolates from Asian patients [57]. For the distribution of *hrgA* in our 33 tested gastric cancer strains, 25 (76%) tested positive for the presence of this gene, which was higher than previously reported rates of prevalence (43%). 21 of the remaining 51 (41%) isolates of non-cancer patients were positive for the gene. There is no statistical significance for the distribution of *hrgA* in different diseases (Table 5). There are many additional variable genes that were screened by microarray among the tested strains. Validating each of these genes one by one by PCR would be laborious and be contrary to the goals of a microarray-based experiment, which is rapid and high throughput genomic analysis. Since the custom HP 90 k tiling microarray has been well designed, established, and evaluated in this study, a greater number of strains need to be analyzed by this tool in order to gather more detailed and reliable information about which variable genes contribute to different disease status.

We initially tried to cover all sequenced strains for probe design. At the time, only six strains had completed genome maps online. P12 was selected as a major tiling reference sequence since it is the longest. Strain specific genes of an additional five strains were also tiled to search for possible differences among the tested strains. To quickly evaluate the accuracy of this array design, we initially hybridized a well known sequenced strain 26695 and two strains isolated from two gastric cancer patients in Heilongjiang province. Paired comparison of these strains for a 0–100 kb region based on the P12 reference genome revealed several regions with genetic variation. Specific primers were designed for these genes, and PCR validation was performed in 26695, HLJ005, and HLJ038. Of the 12 genes tested, 11 were consistent with the microarray prediction (data not shown). For the strain specific genes of the six sequenced strains, our results precisely predicted that all strain specific genes of 26695 are actually present in 26695 compared to HLJ005 and HLJ038. These results indicate that the designed

microarray can provide an accurate analysis for exploring genomic diversity among different HP strains.

The aim of this study was to search for genomic characteristics that may contribute to various digestive diseases. Strain selection is one of the most important aspects of this study because genomic diversity exists among strains of different geographic origin. To eliminate this interference, we selected eight strains that originated from a northeast province of China. Heilongjiang province has one of the highest incidence rates of gastric cancer. Our results show that comparison of the strains with the same diseases (HLJ005 vs HLJ038) have less variation than the strains with different diseases, which indicates that it is reasonable to further investigate more paired strains with different clinical diseases.

With the rapid development of next generation sequencing technology and reduced costs, microarrays will be completely replaced by sequencing in the future. However, no one can predict

how long this change will take. We believe, that because of its low cost, microarray technology will continue to play an important role in genomic and expression level analyses of bacterial pathogens for several years. It also has easy handling and rapid time saving advantages. The established in situ synthesized high density oligo tiling microarray was successfully utilized in this study and can be used as a high throughput analytic tool for comparative genomics of *H. pylori*. Results of our study promote further understanding of specific disease-associated genes that can serve as novel biomarkers for identification of gastroduodenal diseases.

## Author Contributions

Conceived and designed the experiments: YY JZ. Performed the experiments: YY BZ XT. Analyzed the data: YY. Contributed reagents/materials/analysis tools: YH LH MZ JF YG. Wrote the paper: YY.

## References

- Marshall B (1994) *Helicobacter pylori*. Am J Gastroenterol 89: S116–S128.
- Uemura N, Okamoto S, Yamamoto S, Matsumura N, Yamaguchi S, et al. (2001) *Helicobacter pylori* infection and the development of gastric cancer. N Engl J Med 345: 784–789.
- Gerhard M, Rad R, Prinz C, Naumann M (2002) Pathogenesis of *Helicobacter pylori* infection. Helicobacter 7(Suppl 1): 17–23.
- Kraft C, Suerbaum S (2005) Mutation and recombination in *Helicobacter pylori*: mechanisms and role in generating strain diversity. Int J Med Microbiol 295: 299–305.
- Falush D, Wirth T, Linz B, Pritchard JK, Stephens M, et al. (2003) Traces of human migrations in *Helicobacter pylori* populations. Science 299: 1582–1585.
- Moodley Y, Linz B, Yamaoka Y, Windsor HM, Breurec S, et al. (2009) The peopling of the Pacific from a bacterial perspective. Science 323: 527–530.
- Linz B, Balloux F, Moodley Y, Hua L, Manica A, et al. (2007) An African origin for the intimate association between humans and *Helicobacter pylori*. Nature 445: 915–918.
- Mikihiko K, Yoshikazu F, Koji Y, Takeshi T, Kenshiro O, et al. (2011) Evolution in an oncogenic bacterial species with extreme genome plasticity: *Helicobacter pylori* East Asian genomes. BMC Microbiology 11: 104.
- Fischer W (2011) Assembly and molecular mode of action of the *Helicobacter pylori* Cag type IV secretion apparatus. FEBS J 278: 1203–1212.
- Terradot L, Waksman G (2011) Architecture of the *Helicobacter pylori* Cag-type IV secretion system. FEBS J 278: 1213–1222.
- Tegtmeyer N, Wessler S, Backert S (2011) Role of the cag-pathogenicity island encoded type IV secretion system in *Helicobacter pylori* pathogenesis. FEBS J 278: 1190–1202.
- Olbermann P, Josenhans C, Moodley Y, Uhr M, Stamer C, et al. (2010) A global overview of the genetic and functional diversity in the *Helicobacter pylori* cag pathogenicity island. BMC Genomics 11: 368.
- Nilsson C, Sillen A, Eriksson L, Strand ML, Enroth H, et al. (2003) Correlation between cag pathogenicity island composition and *Helicobacter pylori*-associated gastroduodenal disease. Infect Immun 71: 6573–6581.
- Backert S, Schwarz T, Miehle S, Kirsch C, Sommer C, et al. (2004) Functional analysis of the cag pathogenicity island in *Helicobacter pylori* isolates from patients with gastritis, peptic ulcer, and gastric cancer. Infect Immun 72: 1043–1056.
- Tomb J, White O, Kerlavage A, Clayton R, Sutton G, et al. (1997) The complete genome sequence of the gastric pathogen *Helicobacter pylori*. Nature 388: 539–547.
- Alm R, Ling L, Moir D, King B, Brown E, et al. (1999) Genomic-sequence comparison of two unrelated isolates of the human gastric pathogen *Helicobacter pylori*. Nature 397: 176–180.
- Oh J, Kling H, Giannakis M, Xu J, Fulton R, et al. (2006) The complete genome sequence of a chronic atrophic gastritis *Helicobacter pylori* strain: evolution during disease progression. Proc Natl Acad Sci U S A 103: 9999–10004.
- Baltrus D, Amieva M, Covacci A, Lowe T, Merrell D, et al. (2009) The complete genome sequence of *Helicobacter pylori* strain G27. J Bacteriol 191: 447–448.
- Devi S, Taylor T, Avasthi T, Kondo S, Suzuki Y, et al. (2010) Genome of *Helicobacter pylori* strain 908. J Bacteriol 192: 6488–6489.
- Avasthi T, Devi S, Taylor T, Kumar N, Baddam R, et al. (2011) Genomes of the two chronological isolates (*Helicobacter pylori* 2017 and 2018) of the West African *Helicobacter pylori* strain 908, obtained from a single patient. J Bacteriol 193: 3385–3386.
- Furuta Y, Kawai M, Yahara K, Takahashi N, Handa N, et al. (2011) Birth and death of genes linked to chromosomal inversion. Proc Natl Acad Sci U S A 108: 1501–1506.
- Devi S, Taylor T, Avasthi T, Kondo S, Suzuki Y, et al. (2010) Genome of *Helicobacter pylori* strain 908. J Bacteriol 192: 6488–6489.
- Mark S, Carrie L, Dawn A, Richard M, Timothy L, et al. (2009) Genome sequence analysis of *Helicobacter pylori* strains associated with gastric ulceration and gastric cancer. BMC Genomics 10: 3.
- Devi S, Irshad A, Aleem A, Syed A, Ayesha A, et al. (2006) Genomes of *Helicobacter pylori* from native Peruvians suggest admixture of ancestral and modern lineages and reveal a western type cag-pathogenicity island. BMC Genomics 7: 191.
- Thiberge J, Boursaux C, Lehours P, Dillies M, Creno S, et al. (2010) From array-based hybridization of *Helicobacter pylori* isolates to the complete genome sequence of an isolate associated with MALT lymphoma. BMC Genomics 11: 368.
- Max F, Thomas J, Dirk W, Rolf D, Rainer H, et al. (2010) Sequencing, annotation, and comparative genome analysis of the gerbil-adapted *Helicobacter pylori* strain B8. BMC Genomics 11: 335.
- Mane S, Dominguez M, Blaser M, Sobral B, Hontecillas R, et al. (2010) Host-Interactive genes in Amerindian *Helicobacter pylori* diverge from their old world homologs and mediate inflammatory responses. J Bacteriol 192: 3078.
- Raymond J, Thiberge J, Kalach N, Bergeret M, Dupont C, et al. (2008) Using macro-arrays to study routes of infection of *Helicobacter pylori* in three families. PLoS One 3: e2259.
- Garcia S, Janssen P, Ouzounis C (2002) Genetic variation between *Helicobacter pylori* strains: gene acquisition or loss? Trends Microbiol 10: 445–447.
- Salama N, Guillemin K, McDaniel T, Sherlock G, Tompkins L, et al. (2000) A whole-genome microarray reveals genetic diversity among *Helicobacter pylori* strains. Proc Natl Acad Sci U S A 97: 14668–14673.
- Israel D, Salama N, Arnold C, Moss S, Ando T, et al. (2001) *Helicobacter pylori* strain-specific differences in genetic content, identified by microarray, influence host inflammatory responses. J Clin Invest 107: 611–620.
- Momynaliev K, Smirnova O, Kudryavtseva L, Govorun V (2003) Comparative genome analysis of *Helicobacter pylori* strains. Mol Biol 37: 529–536.
- Gressmann H, Linz B, Ghai R, Pleissner K, Schlupbach R, et al. (2005) Gain and loss of multiple genes during the evolution of *Helicobacter pylori*. PLoS Genet 1: e43.
- Han Y, Liu W, Shi Y, Lu L, Xiao S, et al. (2007) Comparative genomics profiling of clinical isolates of *Helicobacter pylori* in Chinese populations using DNA microarray. J Microbiol 45: 21–28.
- Romo C, Salama N, Burgeño J, Ponce V, Lazzcano E, et al. (2009) Differences in genome content among *Helicobacter pylori* isolates from patients with gastritis, duodenal ulcer, or gastric cancer reveal novel disease-associated genes. Infect Immun 77: 2201–2211.
- Salama N, Guillemin K, McDaniel T, Sherlock G, Tompkins L, et al. (2000) A whole-genome microarray reveals genetic diversity among *Helicobacter pylori* strains. Proc Natl Acad Sci USA 97: 14668–14673.
- Nina R, Gerardo G, Brooke D, Francisco A, John C, et al. (2007) Genetic analysis of *Helicobacter pylori* strain populations colonizing the stomach at different times postinfection. J Bacteriol 189: 3834–3845.
- Linz B, Schuster SC (2007) Genomic diversity in *Helicobacter* and related organisms. Res Microbiol 158: 737–744.
- Michael J, Dominic S, Wilmoth J, Ross M, Munro S, et al. (2007) Identification of upper respiratory tract pathogens using electrochemical detection on an oligonucleotide microarray. PLoS ONE 2: e924.
- Michael J, Dominic S, Mark E, Axel G, Marty R, et al. (2006) Use of Semiconductor-based oligonucleotide microarrays for influenza A virus subtype identification and sequencing. J Clin Microbiol 44: 1209–1218.
- Chen J, Hsueh H, Delongchamp R, Lin C, Tsai C (2007) Reproducibility of microarray data: a further analysis of microarray quality control (MAQC) data. BMC Bioinformatics 8: 412.
- Diaz R, Rueda O (2007) ADaCGH: A parallelized web-based application and R package for the analysis of aCGH data. PLoS ONE 2: e737.
- Olshen A, Venkatraman E, Lucito R, Wigler M (2004) Circular binary segmentation for the analysis of array-based DNA copy number data. Biostatistics 5: 557–572.

44. Xu Q, Morgan R, Roberts R, Blaser M (2000) Identification of type II restriction and modification systems in *Helicobacter pylori* reveals their substantial diversity among strains. *Proc Natl Acad Sci U S A* 97: 9671–9676.
45. Kong H, Lin L, Porter N, Stükel S, Byrd D, et al. (2000) Functional analysis of putative restriction-modification system genes in the *Helicobacter pylori* J99 genome. *Nucleic Acids Res* 28: 3216–3223.
46. Lin L, Posfai J, Roberts R, Kong H (2001) Comparative genomics of the restriction-modification systems in *Helicobacter pylori*. *Proc Natl Acad Sci U S A* 98: 2740–2745.
47. Ando T, Ishiguro K, Watanabe O, Miyake N, Kato T, et al. (2010) Restriction-modification systems may be associated with *Helicobacter pylori* virulence. *J Gastroenterol Hepatol Suppl* 1: S95–98.
48. Andres S, Skoglund A, Nilsson C, Krabbe M, Björkholm B, et al. (2010) Type I restriction-modification loci reveal high allelic diversity in clinical *Helicobacter pylori* isolates. *Helicobacter* 15: 114–25.
49. Jonge R, Kuipers E, Langeveld S, Loffeld R, Stoof J, et al. (2004) The *Helicobacter pylori* plasticity region locus jhp0947-jhp0949 is associated with duodenal ulcer disease and interleukin-12 production in monocyte cells. *FEMS Immunol Med Microbiol* 41: 161–167.
50. Adriana S, Dulciene M, Armelle M, Armelle M, Gifone A, et al. (2003) New pathogenicity marker found in the plasticity region of the *Helicobacter pylori* genome. *J Clin Microbiol* 41: 1651–1655.
51. Yamaoka Y (2008) Roles of the plasticity regions of *Helicobacter pylori* in gastroduodenal pathogenesis. *J Med Microbiol* 57: 545–553.
52. Karnholz A, Hoefler C, Odenbreit S, Fischer W, Hofreuter D, et al. (2006) Functional and topological characterization of novel components of the comB DNA transformation competence system in *Helicobacter pylori*. *J Bacteriol* 188: 882–893.
53. Janssen P, Audit B, Ouzounis C (2001) Strain-specific genes of *Helicobacter pylori*: distribution, function and dynamics. *Nucleic Acids Res* 29: 4395–4404.
54. Dangeruta K, Billie V, Asish K, Lizbeth C, Alejandro B, et al. (2003) Cluster of type IV secretion genes in *Helicobacter pylori*'s plasticity zone. *J Bacteriol* 185: 3764–3772.
55. Hoffmann R, Zimmer R, Haas R (2010) Strain-specific genes of *Helicobacter pylori*: genome evolution driven by a novel type IV secretion system and genomic island transfer. *Nucleic Acids Res* 38: 6089–6101.
56. Kersulyte D, Lee W, Subramaniam D, Anant S, Herrera P, et al. (2009) *Helicobacter pylori*'s plasticity zones are novel transposable elements. *PLoS ONE* 4: e6859.
57. Takafumi A, Trudy M, Richard M, Rahul A, Ariane I, et al. (2002) A *Helicobacter pylori* restriction endonuclease-replacing gene, hrgA, is associated with gastric cancer in Asian strains. *Cancer Res* 62: 2385–2389.
